# Supplementary material
Source: publisher figshare collection journal article supplement (https://tandf.figshare.com/ndownloader/files/20942472)
Supplement: Supplementary file 1 [file 20942472]

**Appendix A.**

The Appendix contains sentences and probe questions for garden path and non-garden path conditions, as well as a sample of syntactic movement and non-movement conditions.

A complete list of stimuli, their audio recordings and raw data have been uploaded with the submission and posted to the Open Science Framework DOI 10.17605/OSF.IO/M87SV. They will be publicly available on osf.org once the article is accepted for publication.

Garden Path

1. While the cat groomed the little kittens explored the living room and clawed the furniture.

Did the cat groom the kittens?

1. While the chimpanzees groomed the baboons that were large and hairy sat in the grass and played with sticks.

Did the chimpanzees groom the baboons?

1. While the little girl dressed the doll that she was playing with sat on the floor of her bedroom.

Did the little girl dress the doll?

1. While the surgeon shaved the patient who was exhausted and weak from the operation watched television.

Did the surgeon shave the exhausted patient?

1. While the barber shaved his customer walked into the shop and sat down by the window.

Did the barber shave his customer?

1. While the French woman bathed her new puppy that she adopted from the shelter chewed on the TV remote.

Did the French woman bathe her new puppy?

1. When the grandparents woke up their three grandchildren were racing around the house playing tag.

Did the grandparents wake up the grandchildren?

1. While the thief hid the jewelry that was elegant and expensive sparkled brightly on the counter.

Did the thief hide the elegant jewelry?

1. While the mother undressed the baby that was bald and helpless cried softly because she was hungry.

Did the mother undress the baby?

1. While the frightened woman hid her family's precious heirlooms from the Civil War era were discovered by the burglars.

Did the frightened woman hide the heirlooms?

Non-Garden Path

1. While the nanny dressed the baby that was small and cute the baby's mother was in the kitchen preparing dinner.

Did the nanny dress the baby?

1. While the father bathed the child that was blond and pudgy the baseball game played on the radio.

Did the father bathe the child?

1. While the jockey tried to settle down the thoroughbred horse that was eager to run the trainer observed and said nothing.

Did the jockey try to settle down the horse?

1. While the mother tried to calm down the children who were irritable her husband left to pick up a pizza.

Did the mother try to calm down the children?

1. While the painters washed the dirty paint brushes that were sitting on the floor the homeowner inspected their work.

Did the painters wash the paint brushes?

1. While the car wash employee dried off the car that was red and shiny the owner fixed a cup of coffee.

Did the car wash employee dry off the car?

1. While the veterinarian dried off the cow that had been in the rainstorm the baby calf chewed some grass.

Did the veterinarian dry off the cow?

1. When the woman woke up the next-door neighbor who is a cranky Army veteran he threatened to call the police.

Did the woman wake up the next-door neighbor?

1. While the theme park attendant tried to calm down the angry family shouting at him the line kept getting longer.

Did the attendant try to calm down the family?

1. While the overnight mall employee undressed the mannequin in the hallway she thought about her upcoming vacation.

Did the employee undress the mannequin?

Syntactic Movement/Non-Movement

1. The architect that the tough fireman at the end of the bar dislikes always has to be the center of the conversation. (Move)

The tough fireman at the end of the bar dislikes that the architect always has to be the center of the conversation. (No-Move)

Is it the fireman who has to be the center of conversation?

1. The accountant that the corrupt detective in the organized crime division dislikes advises the Sicilian mob. (Move)

The corrupt detective in the organized crime division dislikes that the accountant advises the Sicilian mob. (No-Move)

Is it that the accountant advises the mob?

1. The paramedic that the exhausted surgeon at the trauma center criticized gave the patient too much painkiller. (Move)

The exhausted surgeon at the trauma center criticized that the paramedic gave the patient too much painkiller. (No-Move)

Was it that the paramedic criticized the surgeon?

1. The telemarketer that the neurotic secretary with the messy cubicle hates clips coupons with the dull scissors. (Move)

The neurotic secretary with the messy cubicle hates that the telemarketer clips coupons with the dull scissors. (No-Move)

Is it the telemarketer who clips coupons?

1. The skilled editor that the politician with strong connections at the newspaper recommended changed jobs. (Move)

The politician with strong connections at the newspaper recommended that the skilled editor change jobs. (No-Move)

Is it the editor who has connections at the newspaper?

1. The public official that the newly elected district attorney cautioned was under federal investigation. (Move)

The newly elected district attorney cautioned that the public official was under federal investigation. (No-Move)

Is it that the public official is behind in the polls?

1. The mountain biker that the experienced climber on the rescue team yelled at fell off of the narrow trail. (Move)

The experienced climber on the rescue team yelled that the mountain biker fell off of the narrow trail. (No-Move)

Was it that the mountain biker fell off of the trail?

1. The child near the track that the Italian race car driver on his final lap saw wasn't paying any attention. (Move)

The Italian race car driver on his final lap saw that the child near the track wasn't paying any attention. (No-Move)

Was it the driver who wasn't paying attention?

1. The bold astronaut that the captain of the orbiting space ship believed in had returned from the alien planet. (Move)

The captain of the orbiting space ship believed that the bold astronaut had returned from the alien planet. (No-Move)

Was the astronaut described as bold?

1. The park ranger that the camera-man from the nature channel was motioning at had stumbled into a bear's den. (Move)

The camera-man from the nature channel was motioning that the park ranger had stumbled into a bear's den. (No-Move)

Was it the camera-man who stumbled into the den?
